# Supplementary material
Source: HighWire-hosted journal article supplement (https://openheart.bmj.com/content/3/1/e000296)
Supplement: inline-supplementary-material-4 [file inline-supplementary-material-4.pdf]

# Appendix 1: Risk of Bias Assessment(25)

|                | Sequence Allocation | Concealment | Blinding | Blinding of Outcome | Incomplete data | Selective Reporting  |
|----------------|---------------------|-------------|----------|---------------------|-----------------|----------------------|
| CLARITY        | L                   | L           | L        | L                   | L               | L                    |
| CURE           | L                   | L           | L        | L                   | L               | L                    |
| CAPRIE         | L                   | L           | L        | L                   | L               | L(in relevant paper) |
| CURRENT-OASIS  | L                   | L           | L        | L                   | L               | L                    |
| PLATO          | U                   | L           | L        | L                   | L               | L                    |
| TRITON-TIMI 38 | U                   | U           | L        | L                   | L               | L                    |
| TRILOGY        | U                   | L           | L        | L                   | L               | L                    |

L: Low risk of bias

U: Unclear risk of bias

H: High risk of bias
