# Supplementary material
Source: HighWire-hosted journal article supplement (https://openheart.bmj.com/content/3/1/e000296)

Appendix 3: Risk ratios for clopidogrel, prasugrel, ticagrelor and placebo for composite endpoint with black lines representing direct comparison and red lines representing indirect comparison

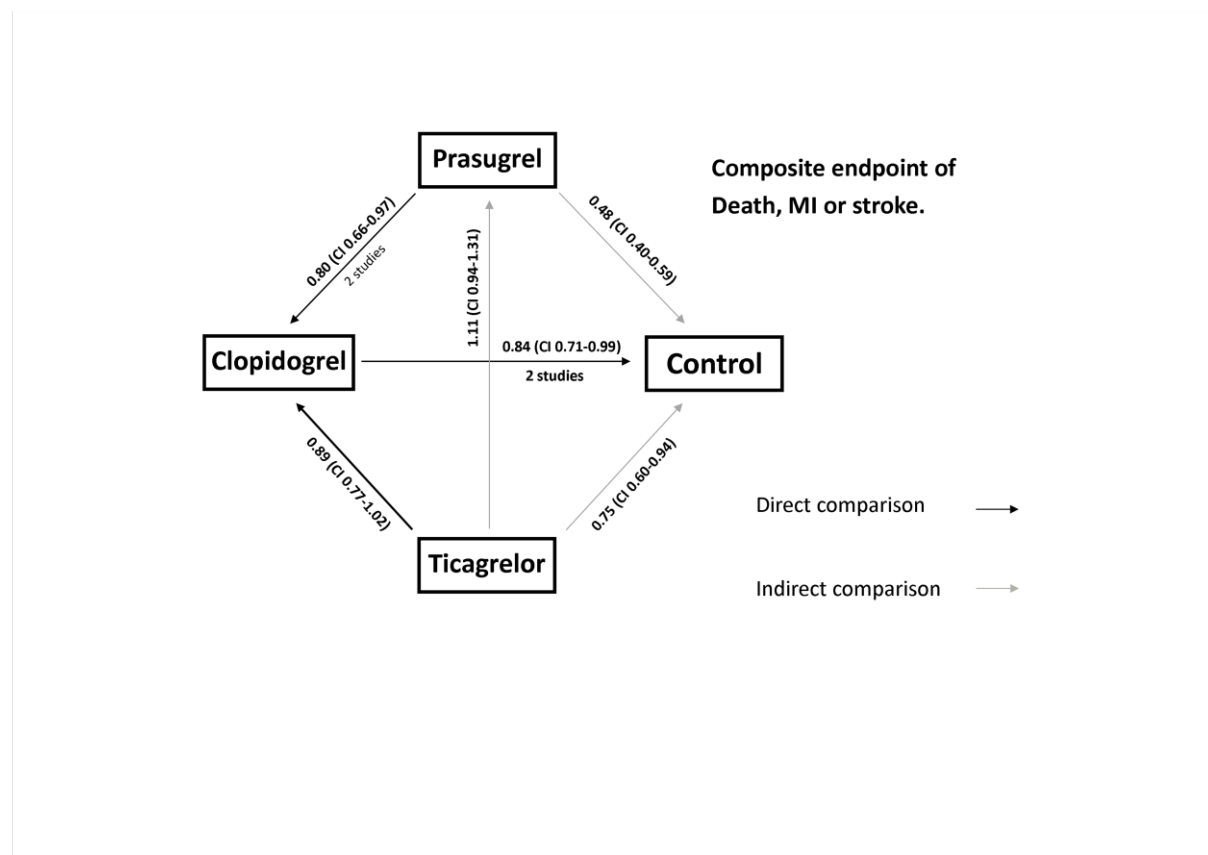

Supplement: inline-supplementary-material-5 [file inline-supplementary-material-5.pdf]
