# Supplementary material
Source: HighWire-hosted journal article supplement (https://openheart.bmj.com/content/3/1/e000296)

## Appendix 2: Flow chart of study identification and inclusion

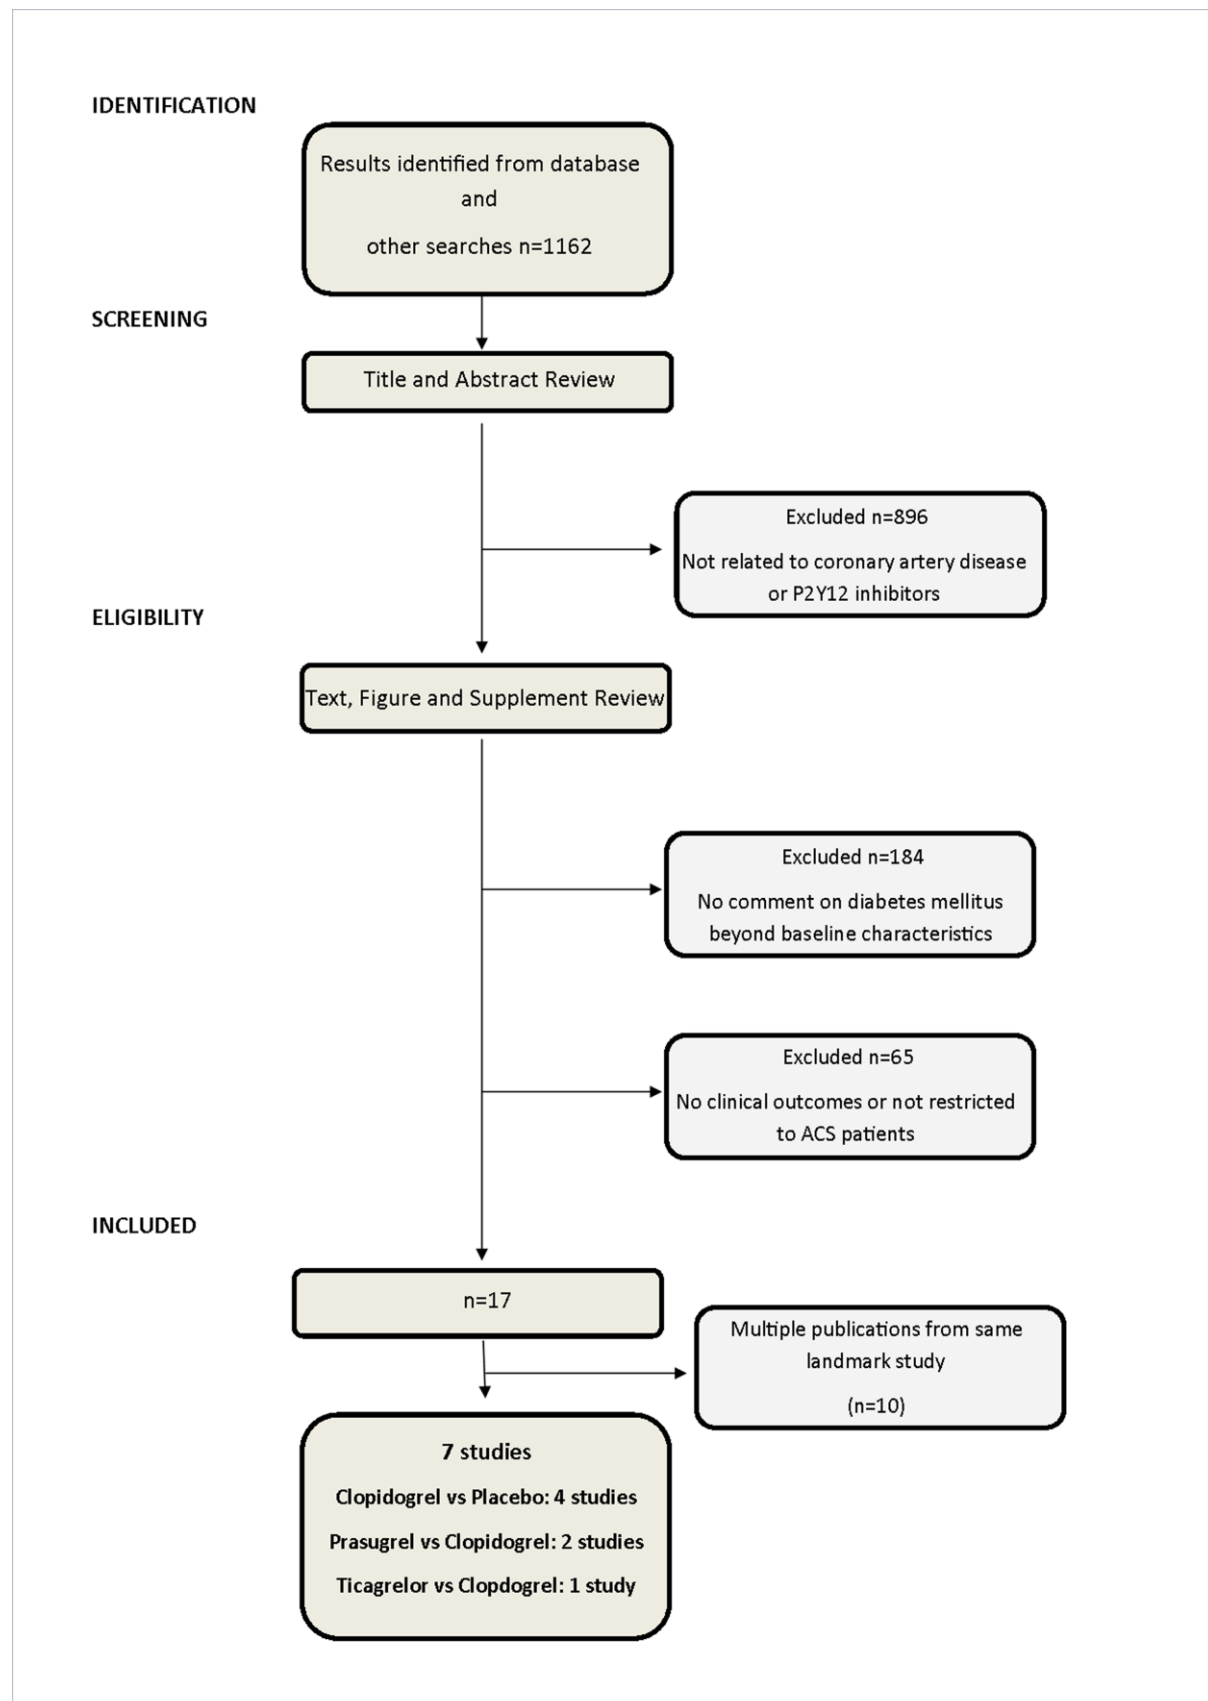

Supplement: inline-supplementary-material-2 [file inline-supplementary-material-2.pdf]
